# Supplementary material for: Reduction and adsorption capacities of soils for Cr( vi ) and quantitative contributions of key influencing factors
Source: Royal Society of Chemistry journal article supplement (doi:10.1039/d5em00633c), 2025-12-09
Supplement: d5em00633c1.pdf [file d5em00633c1.pdf]

## **Supporting Information**

### **Reduction and adsorption capacities of soils for Cr(VI) and quantitative contributions of key influencing factors**

Ze Zhang <sup>a</sup>, Libing Zheng <sup>a</sup>, Xinru Zhai <sup>a</sup>, Shi-Wei Li <sup>a</sup>, Helian Li <sup>a, \*</sup>

<sup>a</sup> School of Water Conservancy and Environment, University of Jinan, Jinan 250022, China

\* Corresponding author E-mail: [chm\\_lihl@ujn.edu.cn](mailto:chm_lihl@ujn.edu.cn) (Helian Li)

Table S1 Summary of existing studies on Cr(VI) sorption in soils

| Soil Type                                                                      | Soil pH    | Reaction conditions (time, temperature, soil/water ratio) | Initial Cr(VI) concentration (mg/L) | Analysis Type of sorption capacity | Sorption capacity (mg/kg) | Conclusion                                                                                                                                                              |
|--------------------------------------------------------------------------------|------------|-----------------------------------------------------------|-------------------------------------|------------------------------------|---------------------------|-------------------------------------------------------------------------------------------------------------------------------------------------------------------------|
| Soils from 35 DoD facilities across the continental U.S. (Jardine et al. 2013) | 3.15-9.01  | 3 replicate of 48 h; 25 ± 1 °C; 1:10                      | 250                                 | Saturated                          | 50-750                    | Cr(VI) sorption increased with increasing soil TOC and decreasing pH.                                                                                                   |
| Paddy soil (Li et al. 2012)                                                    | 5.26-5.57  | 24 h; 25 ± 1 °C; 1:10                                     | 0–100                               | Equilibrium                        | 0-300                     | Cr(VI) adsorption increased with increasing initial Cr(VI) concentration.                                                                                               |
| SOM-removed soil samples (Gu et al. 2017a)                                     | 3.0 - 10.0 | 48 h, 25 °C, 1:200                                        | 0.538 – 27.2                        | Equilibrium                        | 0-1414                    | Cr(VI) retention was strongly dependent on the pH of the reaction solution and Fe oxide content.                                                                        |
| Soil from 7 different regions of China (Liu et al. 2021)                       | 6.89-8.21  | 12 h, /, 1:10                                             | 5-400                               | Equilibrium                        | /                         | Fe <sub>D</sub> was the most crucial factor influencing Cr(VI) adsorption, while soil texture controlled its transport; OM and Al <sub>OX</sub> were secondary factors. |
| Cinnamon soil, fluvo-aquic soil, and loess soil. (Liu et al. 2019)             | 8.26-8.50  | 24 h; 25 °C; 1:25                                         | 160                                 | Equilibrium                        | 180-220                   | Cr(VI) adsorption equilibrium time and capacity varied with soil type and soil layer.                                                                                   |

## References

1. P. M. Jardine, M. A. Stewart, M. O. Barnett, N. T. Basta, S. C. Brooks, S. Fendorf and T. L. Mehlhorn, Influence of soil geochemical and physical properties on chromium(VI) sorption and bioaccessibility. *environ. Sci. Technol* 2013, **47** (19), 11241–11248.
2. X. Li, T. Liu, N. Zhang, G. Ren, F. Li and Y. Li, Effect of Cr(VI) on Fe(III) reduction in three paddy soils from the hani terrace field at high altitude. *Appl. Clay Sci* 2012, **64**, 53–60.
3. X. Gu, J. Xie, X. Wang and L. J. Evans, A simple model to predict chromate partitioning in selected soils from China. *J. Hazard. Mater* 2017, **322**, 421–429.
4. X. Liu, X. Chen, X. Zhang, H. Guo, C. Zhang, X. Zang and B. Li, Quantifying the influence of soil factors on the migration of Chromium (VI). *Process. Saf. Environ. Prot* 2021, **155**, 32–40.
5. X. Liu, B. Cheng, R. Zhao, X. Hua, S. Wang, Z. Wang and Z. Ren, Adsorption characteristics of Cr(VI) in three soil types. *Chin. Agric. Sci. Bulletin* 2019, **35** (6), 44–53.  
[in Chinese]
